# Supplementary material
Source: PubMed Central journal article supplement (PMC4526447)
Supplement: NIHMS661037-supplement-01.pdf [file NIHMS661037-supplement-01.pdf]

**Supplementary table 1A.** Immune reactivity in house dust mite allergic individuals.

The sum of Der p/f-specific IgE concentrations as well as IFN $\gamma$ /IL5-production following restimulation on day 14 are shown.

| <b>Subject ID</b> | <b>Status</b> | <b>Sum of Der p/f-spec. IgE [kU/L]</b> | <b>Total IFN<math>\gamma</math></b> | <b>Total IL5</b> | <b>Total SFC</b> |
|-------------------|---------------|----------------------------------------|-------------------------------------|------------------|------------------|
| 1134              | Allergic      | 1.7                                    | 3578                                | 2396             | 5974             |
| 1219              | Allergic      | 4.9                                    | 396                                 | 1420             | 1816             |
| 1213              | Allergic      | 5.5                                    | 307                                 | 83               | 390              |
| 1211              | Allergic      | 7.6                                    | 6070                                | 11123            | 17193            |
| 1136              | Allergic      | 9.4                                    | 1557                                | 13133            | 14690            |
| 1132              | Allergic      | 14                                     | 0                                   | 7767             | 7767             |
| 1133              | Allergic      | 18                                     | 57                                  | 4733             | 4790             |
| 1212              | Allergic      | 23                                     | 603                                 | 19187            | 19790            |
| 1223              | Allergic      | 29                                     | 1540                                | 29733            | 31273            |
| 1214              | Allergic      | 29                                     | 230                                 | 14207            | 14437            |
| 1215              | Allergic      | 33                                     | 0                                   | 5097             | 5097             |
| 1135              | Allergic      | 53                                     | 143                                 | 11193            | 11336            |
| 1220              | Allergic      | 55                                     | 610                                 | 7373             | 7983             |
| 1210              | Allergic      | 60                                     | 4267                                | 20803            | 25070            |
| 1222              | Allergic      | 73                                     | 2520                                | 17946            | 20466            |
| 1131              | Allergic      | 73                                     | 1070                                | 6050             | 7119             |
| 1140              | Allergic      | 83                                     | 0                                   | 4617             | 4617             |
| 1217              | Allergic      | 85                                     | 63                                  | 12000            | 12063            |
| 1221              | Allergic      | 85                                     | 517                                 | 10713            | 11230            |
| 1130              | Allergic      | 108                                    | 0                                   | 433              | 433              |
| 1216              | Allergic      | 143                                    | 0                                   | 520              | 520              |

**Supplementary table 1B.** *Ex vivo* immune reactivity in house dust mite allergic compared to non-allergic individuals.

| Donor ID | Status   | Sum Der p/f-spec.<br>IgE [kU/L] | <i>Ex vivo</i> reactivity<br>(SFC/106 PBMC) |       |
|----------|----------|---------------------------------|---------------------------------------------|-------|
|          |          |                                 | IFN $\gamma$                                | IL-5  |
| 1580     | Allergic | 0.01                            | 3.0                                         | 0.0   |
| 1573     | Allergic | 0.5                             | 0.0                                         | 0.0   |
| 1581     | Allergic | 1.1                             | 3.3                                         | 0.0   |
| 1535     | Allergic | 2.7                             | 0.0                                         | 0.0   |
| 1531     | Allergic | 2.7                             | 3.3                                         | 1.7   |
| 1530     | Allergic | 3.6                             | 15.0                                        | 5.0   |
| 1533     | Allergic | 3.8                             | 0.0                                         | 0.0   |
| 1536     | Allergic | 4.6                             | 0.0                                         | 1.7   |
| 1525     | Allergic | 6.8                             | 0.0                                         | 8.3   |
| 1529     | SIT      | 7.0                             | 1.7                                         | 0.0   |
| 1522     | Allergic | 8.0                             | 0.0                                         | 0.0   |
| 1520     | Allergic | 9.1                             | 0.0                                         | 0.0   |
| 1138     | Allergic | 9.1                             | 0.0                                         | 0.0   |
| 1523     | Allergic | 9.8                             | 15.0                                        | 0.0   |
| 1528     | Allergic | 11.3                            | 0.0                                         | 31.7  |
| 1139     | SIT      | 13.0                            | 0.0                                         | 0.0   |
| 1519     | Allergic | 13.9                            | 0.0                                         | 78.3  |
| 1537     | Allergic | 14.1                            | 0.0                                         | 103.3 |
| 1526     | SIT      | 15.4                            | 1.7                                         | 45.0  |
| 1552     | Allergic | 18.5                            | 0.0                                         | 18.3  |
| 1218     | SIT      | 22.0                            | 1.7                                         | 1.7   |
| 1553     | Allergic | 27.9                            | 0.0                                         | 88.3  |
| 1521     | Allergic | 32.8                            | 0.0                                         | 6.7   |
| 1538     | Allergic | 36.8                            | 5.0                                         | 301.7 |
| 1380     | Allergic | 43.2                            | 11.7                                        | 390.0 |
| 1532     | SIT      | 49.5                            | 0.0                                         | 31.7  |
| 1524     | Allergic | 49.8                            | 11.7                                        | 25.0  |
| 1591     | Allergic | 55.6                            | 5.0                                         | 200.0 |
| 1518     | Allergic | 56.9                            | 11.7                                        | 40.0  |
| 1527     | Allergic | 67.5                            | 10.0                                        | 143.3 |
| 1539     | Allergic | 68.0                            | 0.0                                         | 20.0  |
| 1517     | Allergic | 74.0                            | 30.0                                        | 40.0  |
| 1137     | Allergic | 99.3                            | 8.3                                         | 133.3 |
| 1534     | Allergic | 151.8                           | 1.7                                         | 136.7 |
| 1562     | Non All  | n.d.                            | 6.7                                         | 3.3   |
| 1592     | Non All  | n.d.                            | 0.0                                         | 0.0   |
| 1564     | Non All  | n.d.                            | 0.0                                         | 5.0   |
| 1565     | Non All  | n.d.                            | 3.3                                         | 1.7   |
| 1566     | Non All  | n.d.                            | 1.7                                         | 0.0   |
| 1574     | Non All  | n.d.                            | 0.0                                         | 0.0   |
| 1575     | Non All  | n.d.                            | 0.0                                         | 0.0   |
| 1577     | Non All  | n.d.                            | 0.0                                         | 0.0   |
| 1579     | Non All  | n.d.                            | 0.0                                         | 1.7   |
| 1396     | Non All  | n.d.                            | 1.7                                         | 8.3   |

1  
2  
3  
4  
5  
6  
7  
8  
9  
10  
11  
12  
13  
14  
15  
16  
17  
18  
19  
20  
21  
22  
23  
24  
25  
26  
27  
28  
29  
30  
31  
32  
33  
34  
35  
36  
37  
38  
39  
40  
41  
42  
43  
44  
45  
46  
47  
48  
49  
50  
51  
52  
53  
54  
55  
56  
57  
58  
59  
60

**Supplementary table 2A.** A set of 34 immunodominant peptides accounted for 90% of the total allergen-specific responses in this study and was included into a dust mite megapool (DMP).

| Epitope              | Antigen  | Length | Start |
|----------------------|----------|--------|-------|
| RPASIKTFEEFKKAF      | Der f 1  | 15     | 1     |
| EFKNRYLMSAEAFEQ      | Der f 1  | 15     | 56    |
| DLRSLRTVTPIRMQGGCGSC | Der f 1  | 20     | 96    |
| GCGSCWAFSGVAATESAYLA | Der f 1  | 20     | 111   |
| TIPRGIEYIQQNGVVEERSY | Der f 1  | 20     | 156   |
| EERSYPYVAREQQCR      | Der f 1  | 15     | 171   |
| HYGISNYCQIYPPDVKQIRE | Der f 1  | 20     | 191   |
| KDLRAFQHYDGRTHIQHDNG | Der f 1  | 20     | 226   |
| YQPNYHAVNIVGYGSTQGVD | Der f 1  | 20     | 246   |
| GYGYFQAGNNLMMIEQYPYV | Der f 1  | 20     | 281   |
| VKYVQSNGGAINHLS      | Der p 1  | 15     | 36    |
| DLNAETNACSINGNAPAEI  | Der p 1  | 19     | 76    |
| DLRQMRTVTPIRMQGGCGSC | Der p 1  | 20     | 95    |
| QELVDCASQHGCHGDTIPRG | Der p 1  | 20     | 141   |
| IEYIQHNGVVQESYY      | Der p 1  | 15     | 160   |
| QESYYRYVAREQSCR      | Der p 1  | 15     | 170   |
| RFGISNYCQIYPPNA      | Der p 1  | 15     | 190   |
| NKIREALAQTHSAIA      | Der p 1  | 15     | 205   |
| VIIGIKDLDAFRHYD      | Der p 1  | 15     | 220   |
| KDLDAFRHYDGRTHIQRDNG | Der p 1  | 20     | 225   |
| HAVNIVGYSSNAQGVD     | Der p 1  | 15     | 250   |
| NWGDNGYGYFAANID      | Der p 1  | 15     | 275   |
| DQVDVKDCANHEIKK      | Der p 2  | 15     | 1     |
| CHGSEPCIIHRGKPFQLEAV | Der p 2  | 20     | 21    |
| QLEAVFEANQNTKTA      | Der p 2  | 15     | 36    |
| NTKTAKIEIKASIDG      | Der p 2  | 15     | 46    |
| YDIKYTWNVPKIAPKSENVV | Der p 2  | 20     | 86    |
| GVLACAIATHAKIRD      | Der p 2  | 15     | 115   |
| KDCANNEIKKVMVDGCHGSD | Der f 2  | 20     | 6     |
| CHGSDPCIIHRGKPFQLEAL | Der f 2  | 20     | 21    |
| FDANQNTKTAKIEIKASLDG | Der f 2  | 20     | 41    |
| YDAKYTWNVPKIAPKSENVV | Der f 2  | 20     | 86    |
| SENVVVTVKLVGDNGVLACA | Der f 2  | 20     | 101   |
| PKDPHKFYICSNWEAVHKDC | Der p 23 | 20     | 36    |

1  
2  
3  
4  
5  
6  
7  
8  
9  
10  
11  
12  
13  
14  
15  
16  
17  
18  
19  
20  
21  
22  
23  
24  
25  
26  
27  
28  
29  
30  
31  
32  
33  
34  
35  
36  
37  
38  
39  
40  
41  
42  
43  
44  
45  
46  
47  
48  
49  
50  
51  
52  
53  
54  
55  
56  
57  
58  
59  
60

**Supplementary table 2B.** A set of 41 previously identified *Dermatophagoides sp.*-epitopes selected from the IEDB.

| Epitope               | Antigen | Length | Start | Reference                          |
|-----------------------|---------|--------|-------|------------------------------------|
| NFLESLKYVEANKGAIN     | Der f 1 | 17     | 49    | E James*                           |
| QGGCGSCWAFSGVAATE     | Der f 1 | 17     | 127   | E James*                           |
| QIYPPDVKQIREALTQT     | Der f 1 | 17     | 217   | E James*                           |
| TAIAVIIGIKDLRAFQH     | Der f 1 | 17     | 235   | E James*                           |
| IGIKDLRAFQHYDGRTI     | Der f 1 | 17     | 241   | E James*                           |
| RAFQHYDGRTIIQHDNG     | Der f 1 | 17     | 247   | E James*                           |
| DGRTIIQHDNGYQPNYH     | Der f 1 | 17     | 253   | E James*                           |
| QPNYHAVNIVGYGSTQG     | Der f 1 | 17     | 265   | E James*                           |
| VNIVGYGSTQGVVDYWIV    | Der f 1 | 17     | 271   | E James*                           |
| SLLALSAVYARPSSIKTFEE  | Der p 1 | 20     | 9     | E James*                           |
| YARPSSIKTFEEYKKA FNKS | Der p 1 | 20     | 17    | E James*                           |
| DEFKNRFLMSAEAFEHLKTQ  | Der p 1 | 20     | 55    | E James*                           |
| SAYLAHRNQLDLAEQELVD   | Der p 1 | 20     | 63    | H Yssel (JI, 1992)                 |
| LAHRNQLDLAEQELVDCAS   | Der p 1 | 20     | 66    | H Yssel (JI, 1992)                 |
| LRQMRTVTPIRMQGG       | Der p 1 | 15     | 96    | M Bonvalet (CEA, 2011)             |
| SCWAFSGVAATESAY       | Der p 1 | 15     | 113   | C Oseroff*                         |
| SGVAATESAYLAYRN       | Der p 1 | 15     | 118   | C Oseroff*                         |
| RGIEYIQHNGVVQES       | Der p 1 | 15     | 158   | C Oseroff*                         |
| REALAQTHSAIAVII       | Der p 1 | 15     | 208   | C Oseroff*                         |
| RFGISNYCQIYPPNV       | Der p 1 | 15     | 208   | E Wambre (CEA, 2011)               |
| SWDTNWGDNGYGYFAANIDL  | Der p 1 | 20     | 271   | E James*                           |
| DPCIHRGKPF TLEALF     | Der f 2 | 17     | 71    | E James*                           |
| CHFMKCPLVKGQQYDIK     | Der f 2 | 17     | 119   | E James*                           |
| PLVKGQQYDIKYTWNVP     | Der f 2 | 17     | 125   | E James*                           |
| TWNVPKIAPKSENVVVT     | Der f 2 | 17     | 137   | E James*                           |
| GCHGSEPCIHRGK         | Der p 2 | 14     | 20    | RJ van Neerven (Immunol, 1994)     |
| EPCIHRGKPFQLEAVF      | Der p 2 | 17     | 25    | E James*                           |
| RGKPFQLEAVFEANQNT     | Der p 2 | 17     | 47    | E James*                           |
| LEAVFEANQNTKTAKIE     | Der p 2 | 17     | 53    | E James*                           |
| IDGLEVDVPGIDPNAC      | Der p 2 | 16     | 58    | M Okano (Allergy)                  |
| CHYMKCPLVKGQQYDIK     | Der p 2 | 17     | 73    | E James*                           |
| QQYDIKYTWNVPKIAPKSEN  | Der p 2 | 20     | 84    | LR Crack (Clin Exp Dermatol, 2012) |
| DDGVLACAIATHAKIRD     | Der p 2 | 17     | 129   | E James*                           |
| NKAGVRIYVDIVLNH       | Der p 4 | 15     | 86    | C Oseroff*                         |
| IEFRFYKEITNVFRG       | Der p 4 | 15     | 251   | C Oseroff*                         |
| FEGRLKKAATAFMLA       | Der p 4 | 15     | 311   | C Oseroff*                         |
| AFMLAWNYGVPRVMS       | Der p 4 | 15     | 321   | C Oseroff*                         |
| EHRWREIYNMVKFRM       | Der p 4 | 15     | 381   | C Oseroff*                         |

|                 |         |    |     |            |
|-----------------|---------|----|-----|------------|
| EIYNMVKFRMIAGQE | Der p 4 | 15 | 386 | C Oseroff* |
| YQIAFSRGNRAFAI  | Der p 4 | 15 | 411 | C Oseroff* |
| EFDAFVAYHIGARIV | Der p 4 | 15 | 481 | C Oseroff* |

---

\*direct submission to the IEDB

**Supplementary table 3.** Summary of *ex vivo* detected IL-5 reactivity in house dust mite allergic and non-allergic individuals. Due to limited cell numbers, *ex vivo* IL-5 reactivity was determined in 63 of the 65 patients included in this study.

|                            | <b>IgE-titer</b> | <b>Frequency of donors with <i>ex vivo</i> IL5-reactivity</b> |
|----------------------------|------------------|---------------------------------------------------------------|
| <b>Non-allergic (n=10)</b> |                  |                                                               |
|                            | no IgE           | 0/10 (0%)                                                     |
| <b>Allergic (n=53)</b>     |                  |                                                               |
|                            | IgE < 10 kU/l    | 29/35 (82.8%)                                                 |
|                            | IgE > 10 kU/l    | 1/18 (5.5%)                                                   |



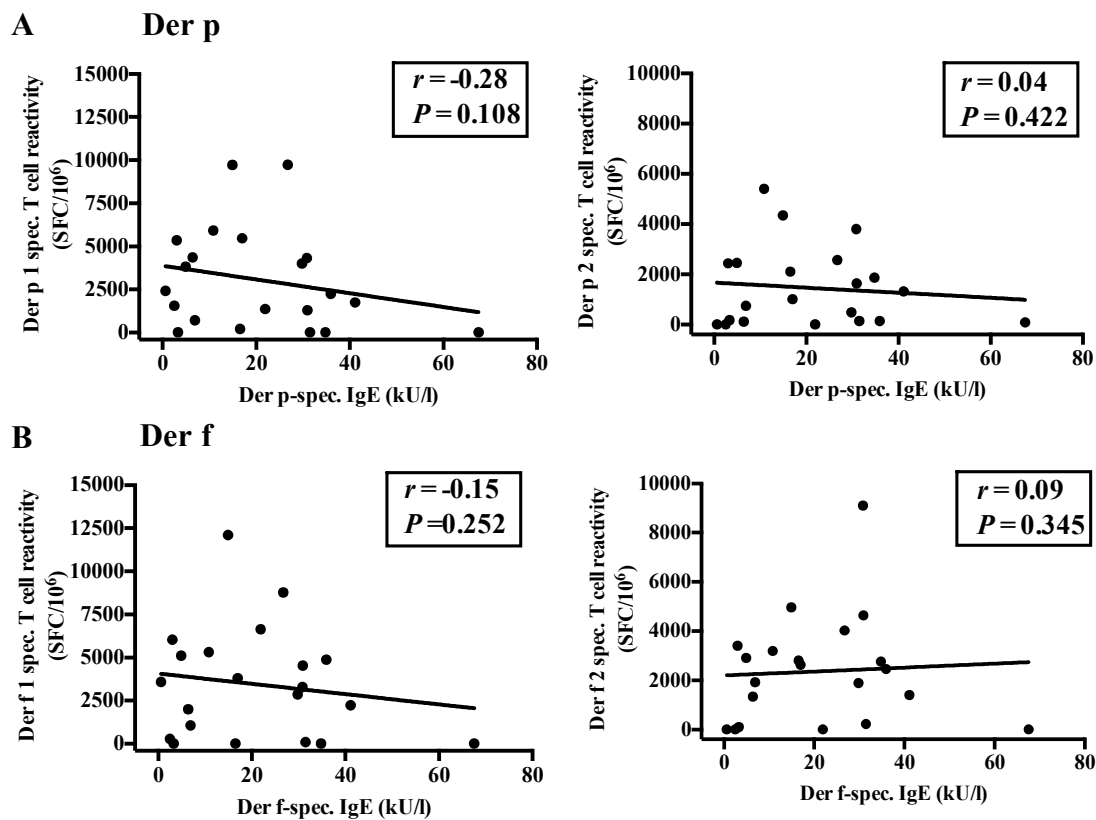

**Supplementary Figure 1.** Correlation between Der p-/Der f-specific IgE and (A) Der p- and (B) Der f-specific T cell reactivity. (Spearman  $r$  and  $P$ -values are shown and best-fit line is plotted.)
